# Supplementary material
Source: publisher figshare collection journal article supplement (https://acs.figshare.com/ndownloader/files/5709561)
Supplement: Supplementary file 1 [file 5709561]

# Inorganic Chemistry

including bioinorganic chemistry

Inorg. Chem., 1998, 37(10), 2326-2327, DOI: [10.1021/ic971453g](https://doi.org/10.1021/ic971453g)

## Terms & Conditions

Electronic Supporting Information files are available without a subscription to ACS Web Editions. The American Chemical Society holds a copyright ownership interest in any copyrightable Supporting Information. Files available from the ACS website may be downloaded for personal use only. Users are not otherwise permitted to reproduce, republish, redistribute, or sell any Supporting Information from the ACS website, either in whole or in part, in either machine-readable form or any other form without permission from the American Chemical Society. For permission to reproduce, republish and redistribute this material, requesters must process their own requests via the RightsLink permission system. Information about how to use the RightsLink permission system can be found at <http://pubs.acs.org/page/copyright/permissions.html>

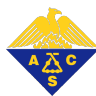

ACS Publications

MOST TRUSTED. MOST CITED. MOST READ.

Copyright © 1998 American Chemical Society

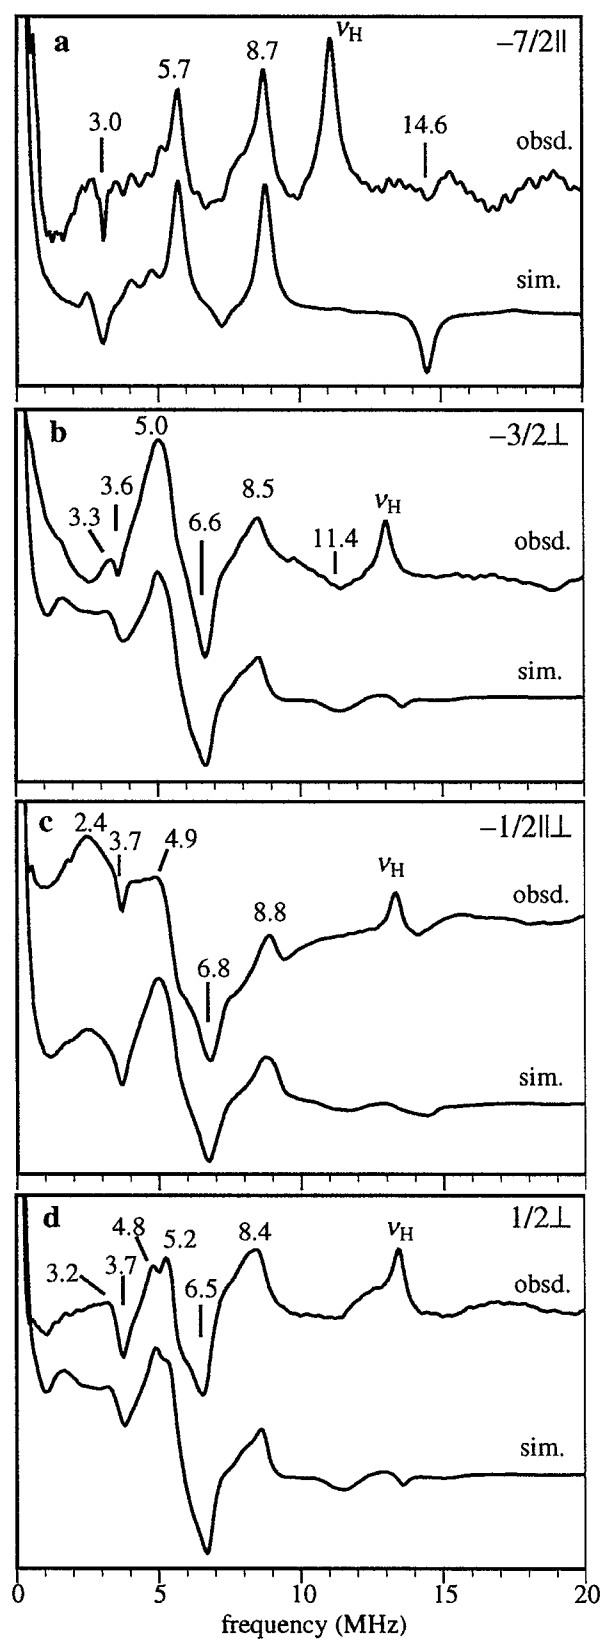

**Figure S1.** Two-pulse ESEEM spectra and their simulations of 2mM VO(Himac)<sub>2</sub> in H<sub>2</sub>O/ethylene glycol 2:1 v/v glass. Conditions:  $\nu = 8.84$  GHz,  $T = 77$  K; (a)  $B = 260.5$  mT; (b)  $B = 305.5$  mT; (c)  $B = 313.0$  mT; (d)  $B = 318.5$  mT. The peaks with  $\nu_H$  are due to matrix <sup>1</sup>H nuclei.

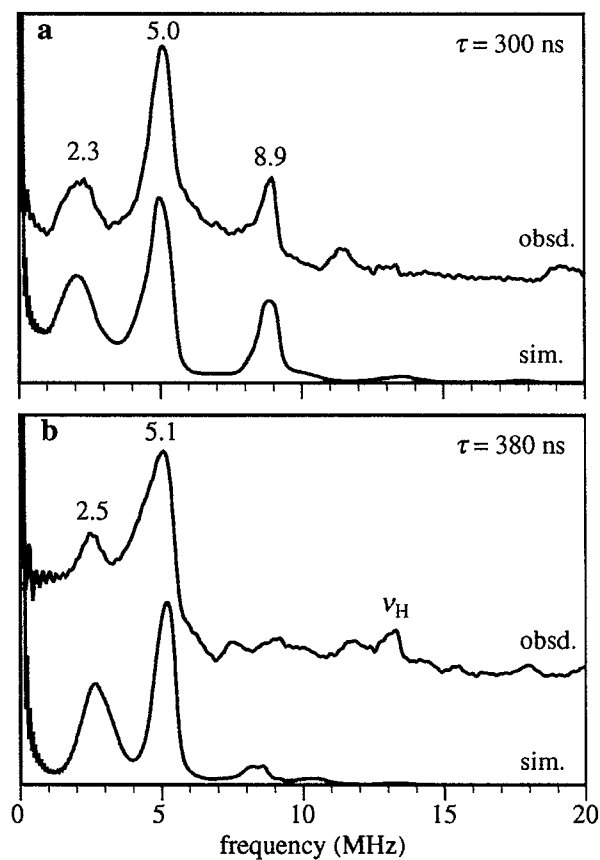

**Figure S2.** Three-pulse ESEEM spectra and their simulations of 2mM VO(Himac)<sub>2</sub> in H<sub>2</sub>O/ethylene glycol 2:1 v/v glass. The  $-1/2||\perp$  line was selected for measurements. Conditions:  $\nu = 8.84$  GHz,  $T = 77$  K,  $B = 313.0$  mT; (a)  $\tau = 300$  ns; (b)  $\tau = 380$  ns. The peak with  $\nu_H$  is due to matrix <sup>1</sup>H nuclei.

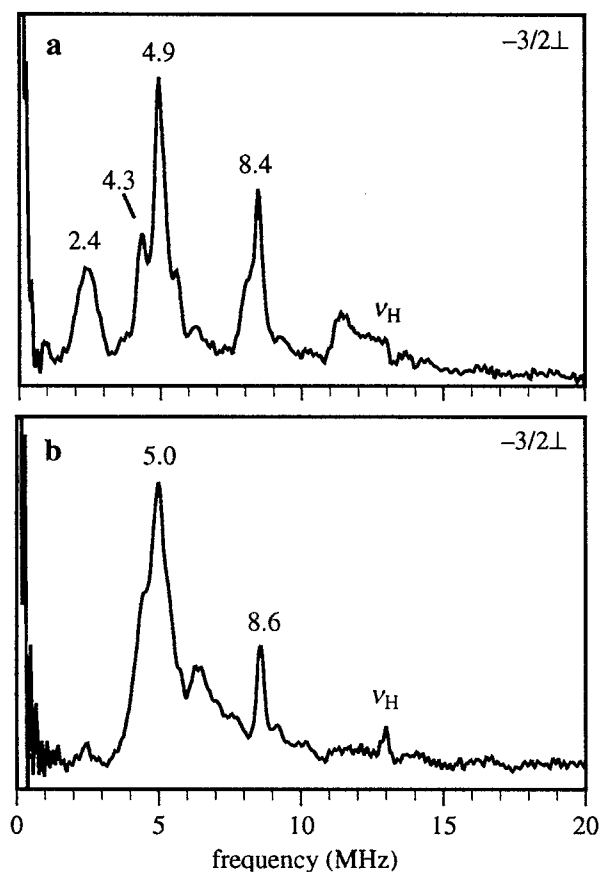

**Figure S3.** (a) Three-pulse ESEEM spectrum of 5mM VO(salhisH)(acac) in 1:1 v/v DMF:toluene glass. Conditions:  $\nu = 8.83$  GHz,  $T = 77$  K,  $B = 305.6$  mT,  $\tau = 310$  ns. (b) Spectrum after addition of one equiv. of aqueous HCl. Conditions:  $\nu = 8.84$  GHz,  $T = 77$  K,  $B = 305.5$  mT,  $\tau = 310$  ns. The peaks with  $\nu_H$  are due to matrix  $^1\text{H}$  nuclei.
